# Supplementary material for: Myceliophthora thermophila M77 utilizes hydrolytic and oxidative mechanisms to deconstruct biomass
Source: PubMed Central journal article supplement (PMC5093097; doi:10.1186/s13568-016-0276-y), 2016-11-02
Supplement: 13568_2016_276_MOESM1_ESM.pdf [file 13568_2016_276_MOESM1_ESM.pdf]

*Myceliophthora thermophila* M77 utilizes alternate glycosidic bond breaking mechanisms to deconstruct biomass

Hévilá Brognaro dos Santos 1, 3, 5, Thaís Milena Souza Bezerra 4, 5, José G. C. Pradella 3, Priscila Delabona 3, Deise Lima 3, Eleni Gomes 2, Steve D. Hartson<sup>6</sup>, Janet Rogers<sup>6</sup>, Brian Couger 5 and Rolf Prade 5, \*

1 Instituto de Física de São Carlos, Universidade de São Paulo, São Carlos/SP, 2 Laboratório de Microbiologia e Bioquímica Aplicada, Departamento de Biologia, IBILCE/UNESP, Rua Cristovão Colombo, 2265 Bairro Jd. Nazareth, CEP 15054-000 São José do Rio Preto-SP/Brazil. 3 Laboratório Nacional de Ciência e Tecnologia do Bioetanol, Rua Giuseppe Máximo Scolfaro, 10.000, Bairro Guarú, CEP 13083-970, Campinas-SP/Brasil. 4 Laboratório de Enzimologia, Instituto de Química, UNESP, Araraquara São Paulo. 5Departments of Microbiology & Molecular Genetics and 6Biochemistry & Molecular Biology, Oklahoma State University, Stillwater, OK 74078, USA.  
AMB Express

Running title: *M. thermophila* Biomass Degradation by Oxidation

\* Corresponding author: R. Prade Email: prade@okstate.edu, Tel: 1-405-744-7522, Fax: 1-405-744-67
